# Supplementary material for: Infiltrating monocytes augment alternative complement activation and exacerbate inherited retinal degeneration in a mouse model
Source: Research Square preprint supplement (doi:10.21203/rs.3.rs-8734757/v1), 2026-05-28
Supplement: Supplementary file 1 [file 0b5489178ea3eb31b462a003.xlsx]

## Sheet: CCR2-MPH vs. microgMia
		GS DETAILS	SIZE	ES	NES	NOM p-val	FDR q-val	FWER p-val	RANK AT MAX	LEADING EDGE
	GS
	follow link to MSigDB
1	HALLMARK_EPITHELIAL_MESENCHYMAL_TRANSITION	Details ...	194	0.77	1.77	0	0	0	3939	tags=58%, list=7%, signal=62%
2	HALLMARK_ESTROGEN_RESPONSE_EARLY	Details ...	197	0.7	1.61	0	0.001	0.002	5765	tags=47%, list=10%, signal=52%
3	HALLMARK_HYPOXIA	Details ...	199	0.68	1.56	0	0.004	0.015	6837	tags=48%, list=12%, signal=55%
4	HALLMARK_UV_RESPONSE_DN	Details ...	144	0.67	1.51	0	0.013	0.058	5736	tags=49%, list=10%, signal=55%
5	HALLMARK_MYOGENESIS	Details ...	199	0.65	1.49	0	0.012	0.068	5725	tags=48%, list=10%, signal=53%
6	HALLMARK_KRAS_SIGNALING_UP	Details ...	198	0.63	1.46	0.001	0.017	0.119	6847	tags=43%, list=12%, signal=49%
7	HALLMARK_KRAS_SIGNALING_DN	Details ...	194	0.63	1.45	0	0.017	0.135	6312	tags=39%, list=11%, signal=43%
8	HALLMARK_ESTROGEN_RESPONSE_LATE	Details ...	193	0.62	1.43	0	0.021	0.181	5992	tags=42%, list=11%, signal=47%
9	HALLMARK_WNT_BETA_CATENIN_SIGNALING	Details ...	42	0.7	1.41	0.025	0.028	0.254	4339	tags=40%, list=8%, signal=44%
10	HALLMARK_ANGIOGENESIS	Details ...	36	0.69	1.36	0.046	0.061	0.502	7133	tags=64%, list=13%, signal=73%
11	HALLMARK_XENOBIOTIC_METABOLISM	Details ...	193	0.58	1.35	0.008	0.065	0.562	6379	tags=36%, list=11%, signal=41%
12	HALLMARK_APICAL_SURFACE	Details ...	44	0.66	1.34	0.049	0.064	0.585	6658	tags=52%, list=12%, signal=59%
13	HALLMARK_APICAL_JUNCTION	Details ...	198	0.58	1.34	0.005	0.064	0.608	4390	tags=31%, list=8%, signal=34%
14	HALLMARK_NOTCH_SIGNALING	Details ...	32	0.69	1.33	0.069	0.066	0.656	5696	tags=44%, list=10%, signal=49%
15	HALLMARK_APOPTOSIS	Details ...	161	0.58	1.33	0.014	0.063	0.666	5992	tags=37%, list=11%, signal=42%
16	HALLMARK_TNFA_SIGNALING_VIA_NFKB	Details ...	196	0.55	1.29	0.026	0.102	0.852	6412	tags=37%, list=11%, signal=41%
17	HALLMARK_IL2_STAT5_SIGNALING	Details ...	199	0.55	1.27	0.025	0.113	0.9	6025	tags=44%, list=11%, signal=49%
18	HALLMARK_BILE_ACID_METABOLISM	Details ...	111	0.56	1.24	0.072	0.15	0.955	6305	tags=35%, list=11%, signal=39%
19	HALLMARK_HEDGEHOG_SIGNALING	Details ...	36	0.64	1.24	0.146	0.158	0.966	2674	tags=36%, list=5%, signal=38%
20	HALLMARK_ADIPOGENESIS	Details ...	200	0.53	1.23	0.056	0.154	0.97	6339	tags=26%, list=11%, signal=29%
21	HALLMARK_COMPLEMENT		185	0.53	1.22	0.062	0.159	0.982	6647	tags=34%, list=12%, signal=38%
22	HALLMARK_REACTIVE_OXYGEN_SPECIES_PATHWAY		48	0.6	1.22	0.154	0.154	0.984	5927	tags=35%, list=10%, signal=40%
23	HALLMARK_COAGULATION		134	0.54	1.21	0.09	0.167	0.991	5049	tags=32%, list=9%, signal=35%
24	HALLMARK_GLYCOLYSIS		199	0.51	1.17	0.117	0.236	0.999	6826	tags=31%, list=12%, signal=35%
25	HALLMARK_P53_PATHWAY		200	0.49	1.14	0.185	0.305	1	6862	tags=34%, list=12%, signal=39%
26	HALLMARK_ALLOGRAFT_REJECTION		188	0.5	1.14	0.182	0.297	1	6278	tags=30%, list=11%, signal=34%
27	HALLMARK_INFLAMMATORY_RESPONSE		197	0.49	1.14	0.169	0.286	1	6508	tags=34%, list=11%, signal=38%
28	HALLMARK_HEME_METABOLISM		189	0.48	1.11	0.254	0.353	1	7971	tags=31%, list=14%, signal=36%
29	HALLMARK_UV_RESPONSE_UP		155	0.47	1.07	0.318	0.432	1	6223	tags=28%, list=11%, signal=31%
30	HALLMARK_CHOLESTEROL_HOMEOSTASIS		71	0.51	1.07	0.346	0.422	1	6168	tags=35%, list=11%, signal=39%
31	HALLMARK_PANCREAS_BETA_CELLS		39	0.53	1.05	0.386	0.484	1	11027	tags=36%, list=19%, signal=44%
32	HALLMARK_TGF_BETA_SIGNALING		53	0.47	0.98	0.526	0.667	1	6953	tags=26%, list=12%, signal=30%
33	HALLMARK_INTERFERON_GAMMA_RESPONSE		188	0.42	0.97	0.591	0.666	1	7016	tags=24%, list=12%, signal=28%
34	HALLMARK_IL6_JAK_STAT3_SIGNALING		85	0.45	0.97	0.53	0.648	1	7419	tags=31%, list=13%, signal=35%
35	HALLMARK_ANDROGEN_RESPONSE		96	0.44	0.97	0.559	0.636	1	6700	tags=28%, list=12%, signal=32%
36	HALLMARK_PI3K_AKT_MTOR_SIGNALING		105	0.42	0.92	0.676	0.739	1	6632	tags=23%, list=12%, signal=26%
37	HALLMARK_FATTY_ACID_METABOLISM		155	0.37	0.84	0.849	0.87	1	7465	tags=22%, list=13%, signal=25%
38	HALLMARK_PROTEIN_SECRETION		94	0.37	0.8	0.869	0.906	1	6755	tags=17%, list=12%, signal=19%
39	HALLMARK_INTERFERON_ALPHA_RESPONSE		94	0.35	0.75	0.92	0.944	1	14220	tags=50%, list=25%, signal=67%
