# Supplementary material for: Infiltrating monocytes augment alternative complement activation and exacerbate inherited retinal degeneration in a mouse model
Source: Research Square preprint supplement (doi:10.21203/rs.3.rs-8734757/v1), 2026-05-28
Supplement: Supplementary file 2 [file 8ee3ec84e697daae69538aca.xlsx]

## Sheet: non-depletion vs. depletion
		GS DETAILS	SIZE	ES	NES	NOM p-val	FDR q-val	FWER p-val	RANK AT MAX	LEADING EDGE
	GS
	follow link to MSigDB
1	HALLMARK_INTERFERON_GAMMA_RESPONSE	Details ...	188	0.74	1.97	0	0	0	5471	tags=58%, list=10%, signal=64%
2	HALLMARK_E2F_TARGETS	Details ...	198	0.74	1.97	0	0	0	11488	tags=81%, list=20%, signal=102%
3	HALLMARK_MYC_TARGETS_V1	Details ...	191	0.73	1.96	0	0	0	11342	tags=79%, list=20%, signal=98%
4	HALLMARK_TNFA_SIGNALING_VIA_NFKB	Details ...	196	0.7	1.86	0	0	0	5676	tags=56%, list=10%, signal=62%
5	HALLMARK_INTERFERON_ALPHA_RESPONSE	Details ...	94	0.73	1.79	0	0	0	5288	tags=60%, list=9%, signal=66%
6	HALLMARK_ALLOGRAFT_REJECTION	Details ...	188	0.67	1.77	0	0	0	8958	tags=55%, list=16%, signal=65%
7	HALLMARK_INFLAMMATORY_RESPONSE	Details ...	197	0.64	1.72	0	0	0	5828	tags=46%, list=10%, signal=51%
8	HALLMARK_MTORC1_SIGNALING	Details ...	197	0.64	1.71	0	0	0.001	9611	tags=62%, list=17%, signal=74%
9	HALLMARK_IL2_STAT5_SIGNALING	Details ...	199	0.63	1.68	0	0.001	0.006	3904	tags=38%, list=7%, signal=40%
10	HALLMARK_OXIDATIVE_PHOSPHORYLATION	Details ...	195	0.61	1.64	0	0.002	0.014	11727	tags=71%, list=21%, signal=89%
11	HALLMARK_G2M_CHECKPOINT	Details ...	195	0.61	1.63	0	0.002	0.016	11488	tags=74%, list=20%, signal=92%
12	HALLMARK_APOPTOSIS	Details ...	161	0.6	1.55	0	0.006	0.054	5555	tags=39%, list=10%, signal=43%
13	HALLMARK_COMPLEMENT	Details ...	185	0.56	1.51	0.003	0.01	0.091	5432	tags=34%, list=10%, signal=38%
14	HALLMARK_KRAS_SIGNALING_UP	Details ...	198	0.56	1.5	0	0.011	0.106	4214	tags=31%, list=7%, signal=34%
15	HALLMARK_MYC_TARGETS_V2	Details ...	57	0.62	1.45	0.012	0.018	0.179	10185	tags=65%, list=18%, signal=79%
16	HALLMARK_REACTIVE_OXYGEN_SPECIES_PATHWAY	Details ...	48	0.65	1.45	0.014	0.018	0.183	9496	tags=63%, list=17%, signal=75%
17	HALLMARK_ESTROGEN_RESPONSE_EARLY	Details ...	197	0.54	1.44	0.002	0.018	0.198	5731	tags=32%, list=10%, signal=35%
18	HALLMARK_ESTROGEN_RESPONSE_LATE	Details ...	193	0.53	1.43	0.006	0.018	0.214	5771	tags=28%, list=10%, signal=32%
19	HALLMARK_CHOLESTEROL_HOMEOSTASIS	Details ...	71	0.59	1.42	0.024	0.019	0.226	9985	tags=58%, list=18%, signal=70%
20	HALLMARK_HYPOXIA	Details ...	199	0.53	1.41	0.001	0.02	0.249	4357	tags=33%, list=8%, signal=36%
21	HALLMARK_EPITHELIAL_MESENCHYMAL_TRANSITION		194	0.52	1.39	0.002	0.024	0.307	5826	tags=37%, list=10%, signal=41%
22	HALLMARK_ANGIOGENESIS		36	0.63	1.35	0.076	0.041	0.472	4666	tags=36%, list=8%, signal=39%
23	HALLMARK_GLYCOLYSIS		199	0.49	1.32	0.022	0.056	0.611	8400	tags=40%, list=15%, signal=46%
24	HALLMARK_COAGULATION		134	0.51	1.32	0.017	0.054	0.612	4290	tags=28%, list=8%, signal=31%
25	HALLMARK_P53_PATHWAY		200	0.49	1.31	0.018	0.058	0.661	5676	tags=34%, list=10%, signal=38%
26	HALLMARK_IL6_JAK_STAT3_SIGNALING		85	0.52	1.28	0.064	0.076	0.761	4811	tags=35%, list=8%, signal=38%
27	HALLMARK_PI3K_AKT_MTOR_SIGNALING		105	0.49	1.24	0.069	0.107	0.876	11737	tags=53%, list=21%, signal=67%
28	HALLMARK_DNA_REPAIR		147	0.47	1.23	0.061	0.123	0.92	10273	tags=54%, list=18%, signal=65%
29	HALLMARK_UV_RESPONSE_UP		155	0.45	1.17	0.118	0.201	0.985	9162	tags=39%, list=16%, signal=46%
30	HALLMARK_APICAL_SURFACE		44	0.52	1.15	0.199	0.225	0.992	3846	tags=30%, list=7%, signal=32%
31	HALLMARK_XENOBIOTIC_METABOLISM		193	0.41	1.1	0.22	0.335	0.999	8145	tags=34%, list=14%, signal=39%
32	HALLMARK_NOTCH_SIGNALING		32	0.51	1.06	0.354	0.413	1	3357	tags=31%, list=6%, signal=33%
33	HALLMARK_UNFOLDED_PROTEIN_RESPONSE		108	0.42	1.04	0.344	0.457	1	12227	tags=56%, list=21%, signal=72%
34	HALLMARK_UV_RESPONSE_DN		144	0.39	1	0.439	0.574	1	4559	tags=24%, list=8%, signal=26%
35	HALLMARK_ADIPOGENESIS		200	0.37	0.98	0.484	0.628	1	10450	tags=44%, list=18%, signal=54%
36	HALLMARK_ANDROGEN_RESPONSE		96	0.37	0.93	0.627	0.786	1	10702	tags=51%, list=19%, signal=63%
37	HALLMARK_PANCREAS_BETA_CELLS		39	0.43	0.93	0.563	0.765	1	685	tags=8%, list=1%, signal=8%
38	HALLMARK_FATTY_ACID_METABOLISM		155	0.34	0.91	0.713	0.801	1	9413	tags=37%, list=17%, signal=45%
39	HALLMARK_MYOGENESIS		199	0.34	0.91	0.719	0.785	1	8304	tags=33%, list=15%, signal=39%
40	HALLMARK_APICAL_JUNCTION		198	0.34	0.9	0.755	0.777	1	5725	tags=22%, list=10%, signal=25%
41	HALLMARK_MITOTIC_SPINDLE		199	0.33	0.9	0.742	0.767	1	10887	tags=44%, list=19%, signal=54%
42	HALLMARK_PROTEIN_SECRETION		94	0.36	0.89	0.712	0.78	1	11742	tags=43%, list=21%, signal=54%
43	HALLMARK_WNT_BETA_CATENIN_SIGNALING		42	0.4	0.89	0.686	0.775	1	1435	tags=17%, list=3%, signal=17%
44	HALLMARK_TGF_BETA_SIGNALING		53	0.39	0.87	0.715	0.818	1	4290	tags=25%, list=8%, signal=27%
